# Supplementary material for: Using Community Science to Reveal the Global Chemogeography of River Metabolomes
Source: MDPI journal article supplement (doi:10.3390/metabo10120518), 2020-12-20

Average AI\_Mod

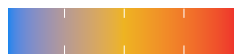

0.20 0.24 0.28

Sediment AI\_Mod

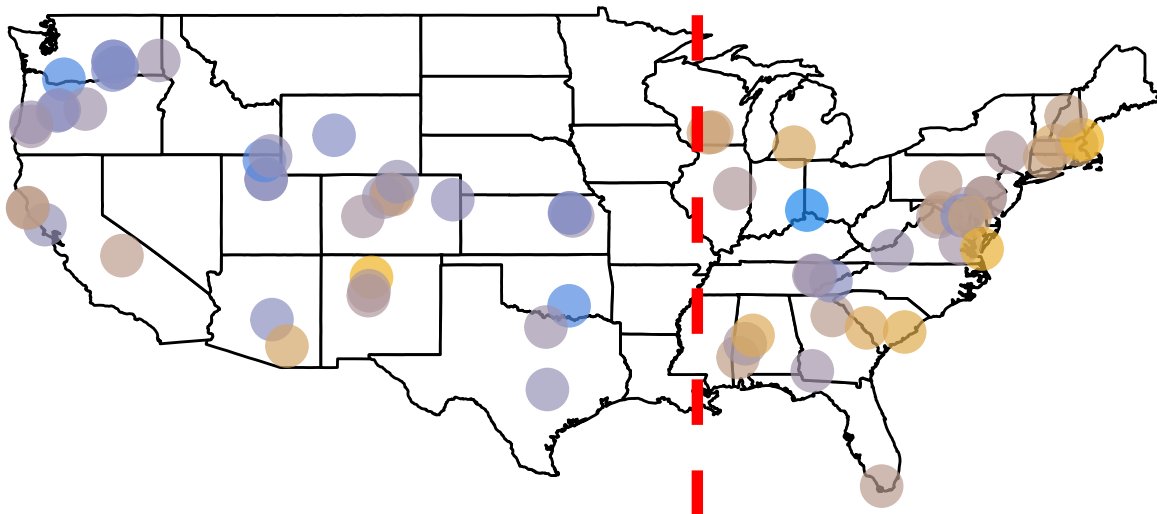

Surface Water AI\_Mod

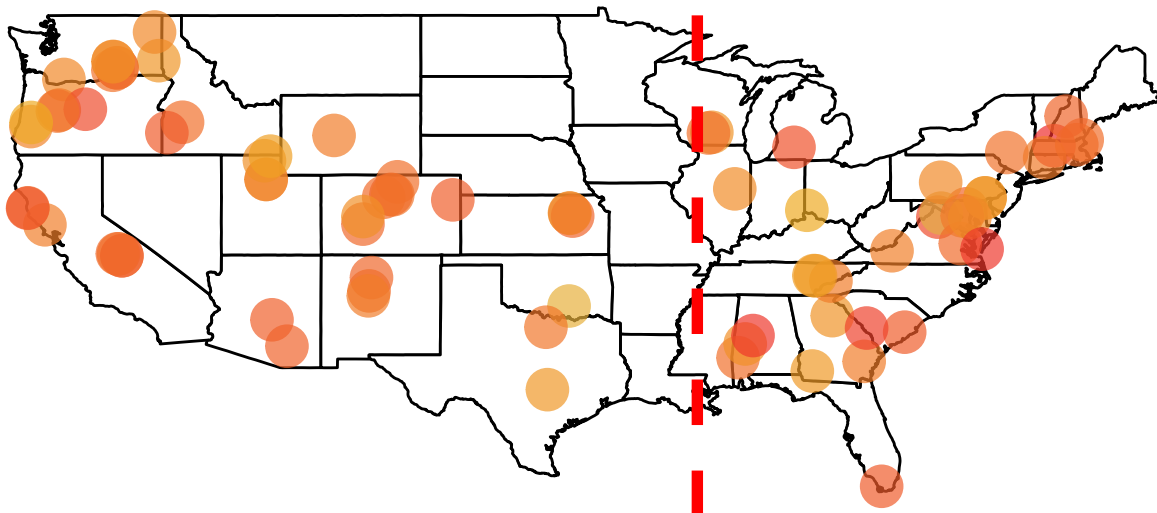

Supplement: s1 [file s1]
