# Supplementary material for: Using Community Science to Reveal the Global Chemogeography of River Metabolomes
Source: MDPI journal article supplement (doi:10.3390/metabo10120518), 2020-12-20

Average StoC

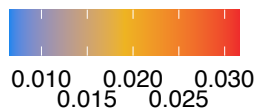

Sediment StoC

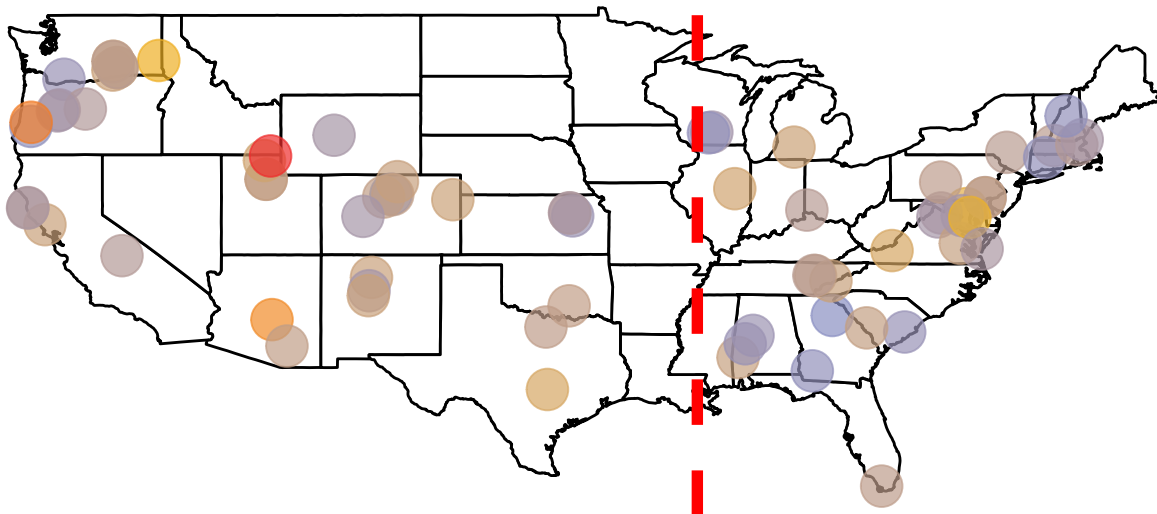

Surface Water StoC

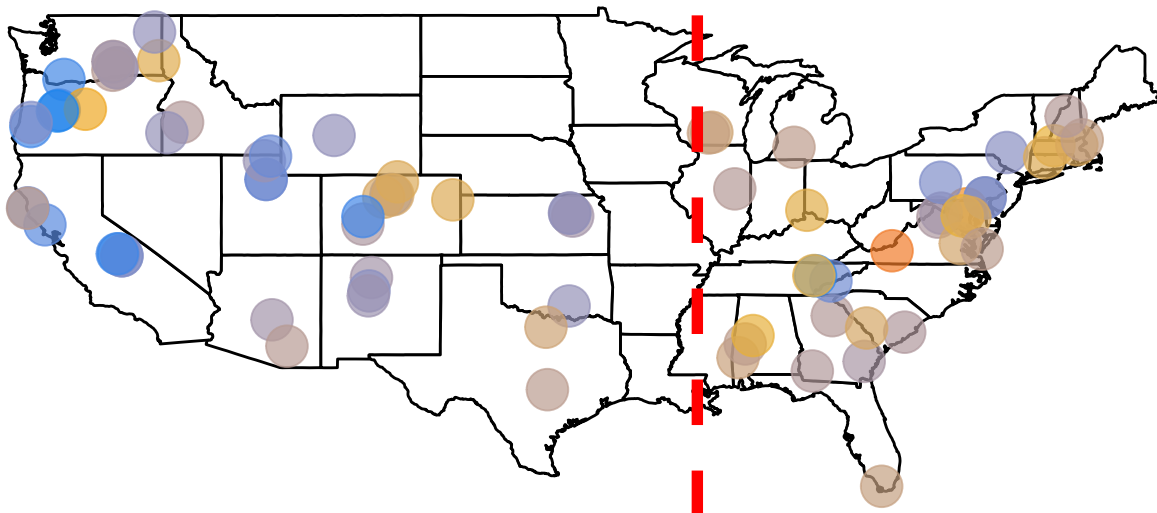

Supplement: s1 [file s1]
