# Supplementary material for: Using Community Science to Reveal the Global Chemogeography of River Metabolomes
Source: MDPI journal article supplement (doi:10.3390/metabo10120518), 2020-12-20

%CHOP

10.0 12.5 15.0 17.5

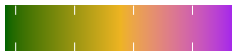

## Sediment CHOP Occurrence

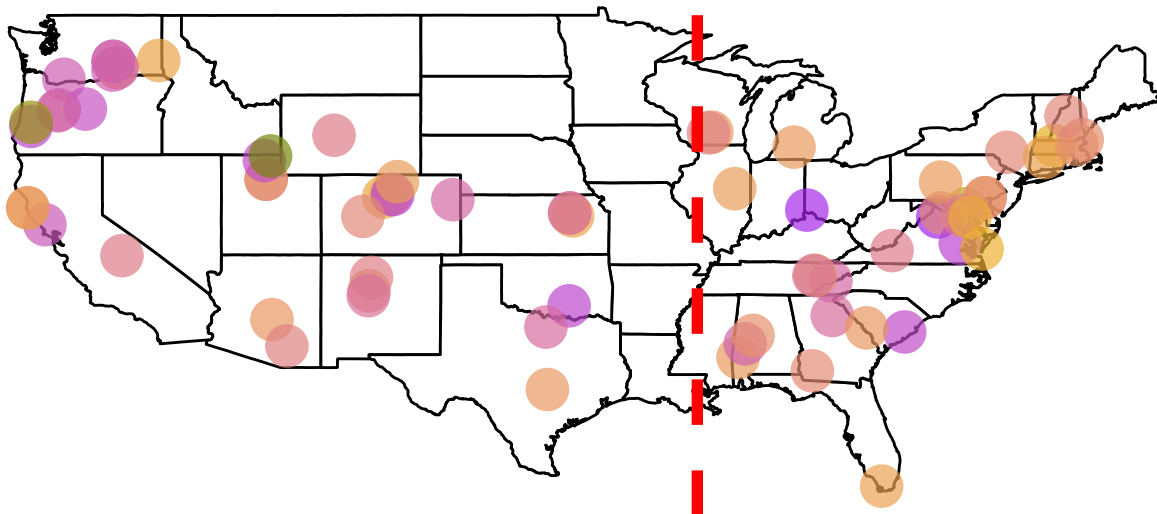

## Surface Water CHOP Occurrence

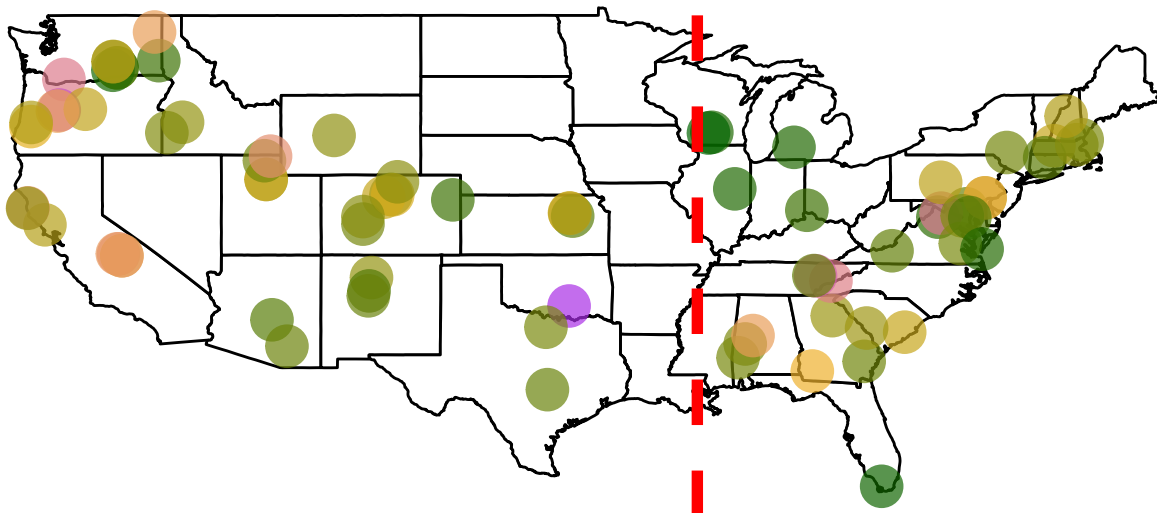

Supplement: s1 [file s1]
