# Supplementary material for: Using Community Science to Reveal the Global Chemogeography of River Metabolomes
Source: MDPI journal article supplement (doi:10.3390/metabo10120518), 2020-12-20

%CHONSP

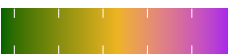

1 2 3 4 5

## Sediment CHONSP Occurrence

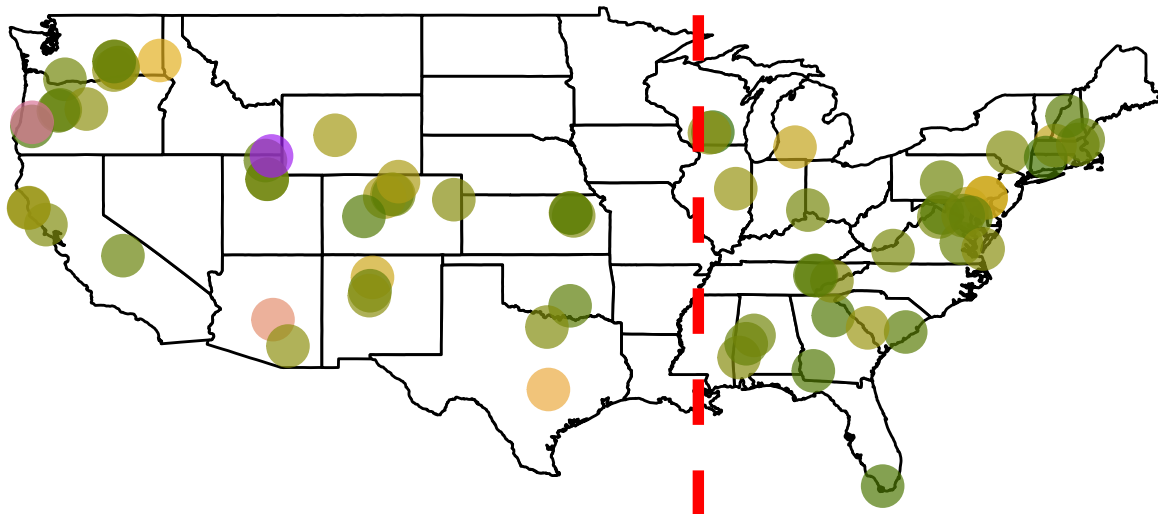

## Surface Water CHONSP Occurrence

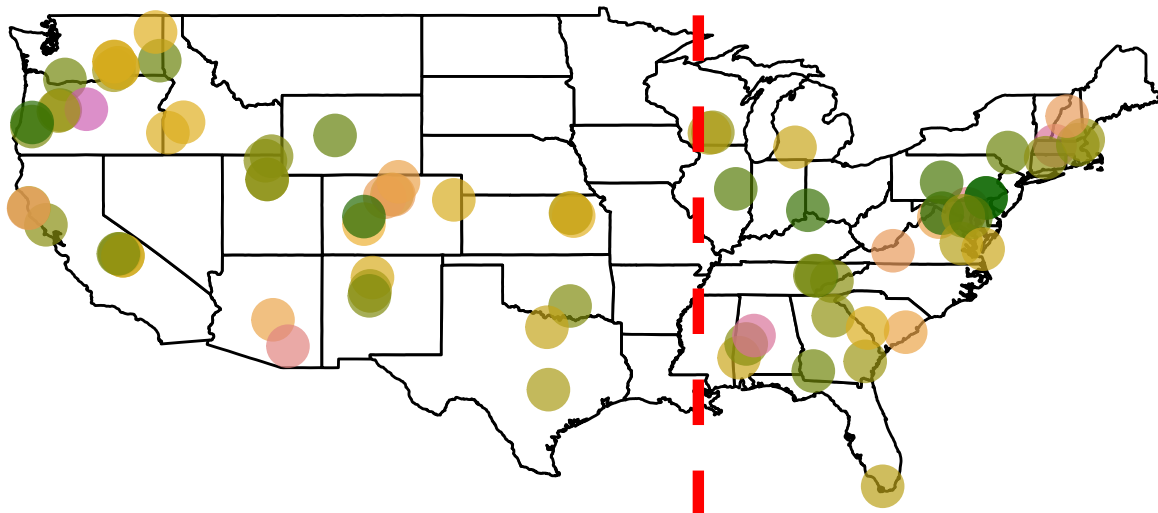

Supplement: s1 [file s1]
